# Supplementary material
Source: publisher figshare collection journal article supplement (https://karger.figshare.com/ndownloader/files/22460606)
Supplement: Supplementary file 1 [file 22460606]

**Supplementary Table 1. Immunohistochemical expression according to the histopathological revision.**

| **Variables** | **G1 (*n* = 81)** | **G2 (*n* = 57)** | **G3 (*n* = 25)** |
| --- | --- | --- | --- |
| CgA +, synaptophysin +; *n* (%) | 76 (93.9) | 49 (86.0) | 18 (72.0) |
| CgA +, synaptophysin -; *n* (%) | 1 (1.2) | 4 (7.0) | 3 (12.0) |
| CgA -, synaptophysin +; *n* (%) | 4 (4.9) | 2 (3.5) | 4 (16.0) |
| CgA -, synaptophysin -; *n* (%) | - | 2 (3.5) | - |

CgA: Chromogranin A
